# Supplementary material for: Transfer of Cardiac Mitochondria Improves the Therapeutic Efficacy of Mesenchymal Stem Cells in a Preclinical Model of Ischemic Heart Disease
Source: MDPI journal article supplement (doi:10.3390/cells12040582), 2023-02-11
Supplement: s1 [file s1]

Supplementary Materials

# Transfer of Cardiac Mitochondria Improves the Therapeutic Efficacy of Mesenchymal Stem Cells in a Preclinical Model of Ischemic Heart Disease

Marie-Luce Vignais <sup>1</sup>, Jennyfer Levoux <sup>2,3</sup>, Pierre Sicard <sup>4</sup>, Khattar Khattar <sup>1</sup>, Catherine Lozza <sup>4</sup>, Marianne Gervais <sup>2</sup>, Safia Mezhoud <sup>2</sup>, Jean Nakhle <sup>1</sup>, Frederic Relaix <sup>2,5,6</sup>, Onnik Agbulut <sup>3</sup>, Jeremy Fauconnier <sup>4</sup> and Anne-Marie Rodriguez <sup>2,3,6\*</sup>

<sup>1</sup> IGF, Univ. Montpellier, CNRS, INSERM, 34094 Montpellier, France; marie-luce.vignais@igf.cnrs.fr (M.-L.V.); khattar.khattar@igf.cnrs.fr (K.K.); jean.nakhle@inserm.fr (J.N.)

<sup>2</sup> Université Paris-Est Créteil, INSERM, IMRB, 94010 Créteil, France; jennyfer.levoux@inserm.fr (J.L.); taurel@u-pec.fr (M.G.); safia.mezhoud@inserm.fr (S.M.); frederic.reliax@inserm.fr (F.R.)

<sup>3</sup> Sorbonne Université, Institut de Biologie Paris-Seine (IBPS), CNRS UMR 8256, INSERM U1164, Biological Adaptation and Ageing, 75005 Paris, France; onnik.agbulut@sorbonne-universite.fr

<sup>4</sup> PhyMedExp, Inserm, CNRS, University of Montpellier, 34295 Montpellier, France; pierre.sicard@inserm.fr (P.S.); catherine.lozza@umontpellier.fr (C.L.); jeremy.fauconnier@inserm.fr (J.F.)

<sup>5</sup> École Nationale Vétérinaire d'Alfort, IMRB, 94700 Maisons-Alfort, France

<sup>6</sup> APHP, Hôpitaux Universitaires Henri Mondor & Centre de Référence des Maladies Neuromusculaires GNMH, 94000 Créteil, France

\* Correspondence: anne-marie.rodriguez@inserm.fr

**Table S1.** Human and mouse primer sequences.

| Gene         | Human primer sequences                                                         | Gene              | Mouse primer sequences                                                              |
|--------------|--------------------------------------------------------------------------------|-------------------|-------------------------------------------------------------------------------------|
| <b>TBP</b>   | Forward : 5'-AACAAACAGCCTGCCACCTTA-3'<br>Reverse : 5'-GGGTCAGTCCAGTGCCATAA-3'  | <b>TBP</b>        | Forward: 5'- ATCCCAAGCGATTTGCTG -3'<br>Reverse: 5'- CCTGTGCACACCATTTTTCC -3'        |
| <b>Ki67</b>  | Forward: 5'-ACGTCGTGTCTCAAGATC-3'<br>Reverse: 5'-CGGTACTGTCTTCTTTGAC-3'        | <b>VEGF</b>       | Forward: 5'-AACGATGAAGCCCTGGAGTG-3'<br>Reverse: 5'-TGAGAGGTCTGTTCCCGA-3'            |
| <b>VEGF</b>  | Forward: 5'-AGAAGGAGGAGGGCAGAATC-3'<br>Reverse: 5'-ACACAGGATGGCTTGAAGATG-3'    | <b>VEcadherin</b> | Forward: 5'-TTGGGCTTCTGACTGTTGT-3'<br>Reverse: 5'-CAGGGACTTCGTGGGTTT-3'             |
| <b>HGF</b>   | Forward: 5'-CGACAGTGTTCCTTCTCG-3'<br>Reverse: 5'-AAGGCTTCAAGGCATCTG-3'         | <b>CD31</b>       | Forward: 5'-CGGTTATGATGATGTTTCTGGA-3'<br>Reverse: 5'-AAGGGGAGGACACTTCCACTTCT-3'     |
| <b>CXCL1</b> | Forward: 5'-TAAAGGTAGCCCTTGTTCCTCC-3'<br>Reverse: 5'-CAGACCACGCAAGGAGTTCA-3'   | <b>CD206</b>      | Forward: 5'-CTCTGTTTCAGCTATTGGACGC-3'<br>Reverse: 5'-CGGAATTCTGGGATTGAGCTTC-3'      |
| <b>CXCL5</b> | Forward: 5'-CTTCCACCTTGGAGCACTGT-3'<br>Reverse: 5'-CCAAGGTGGAAGTGGTAGCC-3'     | <b>Arg1</b>       | Forward: 5'-CTCCAAGCCAAAGTCCTTAGAG-3'<br>Reverse: 5'-AGGAGCTGTCTTAGGGACATC-3'       |
| <b>CXCL6</b> | Forward: 5'-TTTAGAAAAGGGGCTTCCGGG-3'<br>Reverse: 5'-GCGTTTGAGTCAGCAAAGAAGTC-3' | <b>CHIA</b>       | Forward: 5'-ATGGCCAAGCTACTTCTCGTCACA-3'<br>Reverse: 5'-TCCCAGCAAAGGCATAGATCAGGT -3' |
| <b>IL8</b>   | Forward: 5'-TTCCTTGGGGTCCAGACAGA-3'<br>Reverse: 5'-CATGAAGTGTGTTGCCGC-3'       | <b>CHIL3</b>      | Forward: 5'-TGCCTGACTATGAAGCATTGAAT-3'<br>Reverse: 5'-CCAATGGCCAGGAGAGTTTTT-3'      |
| <b>IL11</b>  | Forward: 5'-CAGGGAATCCAGGTTGTGGTC-3'<br>Reverse: 5'-GAAAATCCCAACAGAAGGCCAAA-3' | <b>iNOS</b>       | Forward: 5'-CCACCAACAATGGCAACATCAGGT-3'<br>Reverse: 5'-TAGGTCGATGCACAACTGGGTGAA-3'  |
| <b>IL33</b>  | Forward: 5'-TAACTCAGTAACACCTTATCTGTGA-3'<br>Reverse: 5'-CCAACGTGACGGACTTCCC-3' | <b>TN a</b>       | Forward: 5'-AATGGCCTCCCTCTCATCAGTT-3'<br>Reverse: 5'-CGAATTTTGAGAAGATGATCTGAGTGT-3' |

|              |                                                                               |                      |                                                                             |
|--------------|-------------------------------------------------------------------------------|----------------------|-----------------------------------------------------------------------------|
| <b>LIF</b>   | Forward: 5'-TACACGACTATGCGGTACAGC-3'<br>Reverse: 5'-CTGGCGATACCTCAGCAACC-3'   | <b>LIF</b>           | Forward: 5'-GCTGTATCGGATGGTCGCATA-3'<br>Reverse: 5'-CACAGACGGCAAAGCACATT-3' |
| <b>MMP1</b>  | Forward: 5'-GGTGTGACATTACTCCAGAGTTG-3'<br>Reverse: 5'-GGACTTAGACCGCTTGGCTT-3' | <b>Co -1</b>         | Forward: 5'-GACGCCATCAAGGTCTACTG-3'<br>Reverse: 5'-ACGGGAATCCATCGGTCA-3'    |
| <b>MMP9</b>  | Forward: 5'-TTCAGGGCGAGGACCATAGA-3'<br>Reverse: 5'-TCCAGCAACTTTATGGGGGT-3'    | <b>Co -3</b>         | Forward: 5'-GAGGAATGGGTGGCTATCCG-3'<br>Reverse: 5'-GCGTCCATCAAAGCCTCTGT-3'  |
| <b>MMP14</b> | Forward: 5'-TTCCCGTCACAGATGTTGGG-3'<br>Reverse: 5'-TTCCCGTCACAGATGTTGGG-3'    | <b>Fib onectin-1</b> | Forward: 5'-CCAGGCACTGACTACAAGAT-3'<br>Reverse: 5'-CATGATACCAGCAAGGAGT-3'   |
